# Supplementary material for: TREM2 deficiency reduces the efficacy of immunotherapeutic amyloid clearance
Source: PubMed Central journal article supplement (PMC5009806; doi:10.15252/emmm.201606370), 2016-07-08
Supplement: EMMM-8-0992-s001.pdf [file EMMM-8-0992-s001.pdf]

## Expanded View Figures

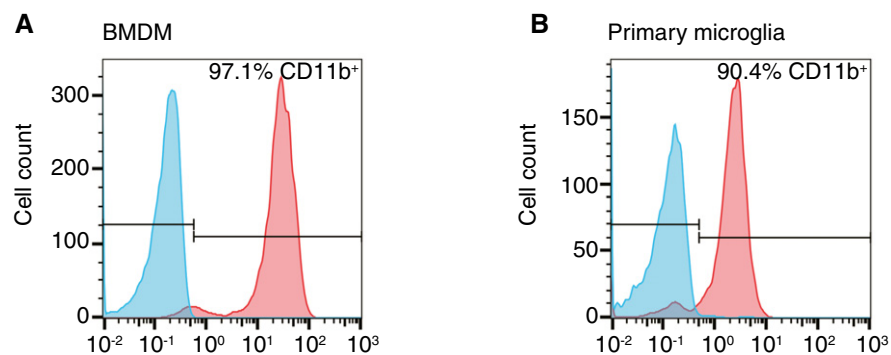**Figure EV1. BMDM and primary microglia are positive for CD11b.**

Surface staining of CD11b was analyzed using flow cytometry.

A About 97.1% bone marrow-derived macrophages (BMDM) were positive for CD11b.

B Primary microglia from mixed glial culture were 90.4% positive for CD11b.
