# Supplementary material for: TREM2 deficiency reduces the efficacy of immunotherapeutic amyloid clearance
Source: PubMed Central journal article supplement (PMC5009806; doi:10.15252/emmm.201606370), 2016-07-08

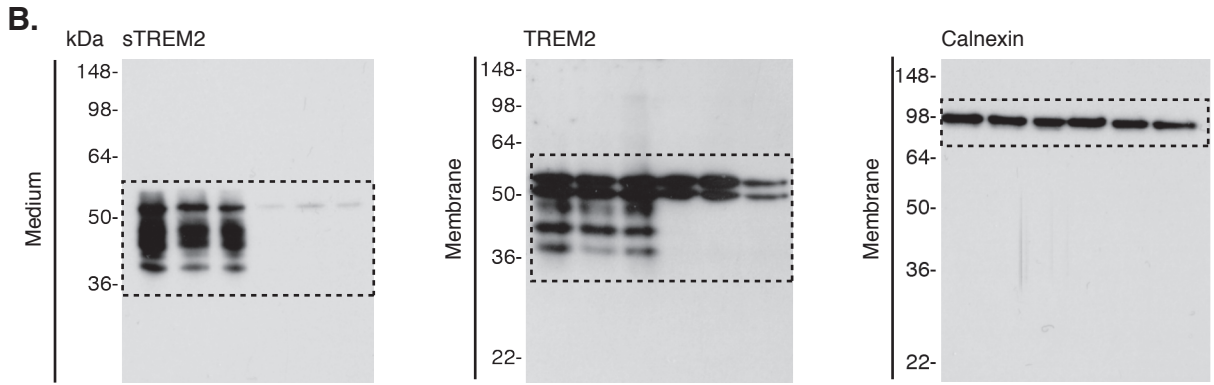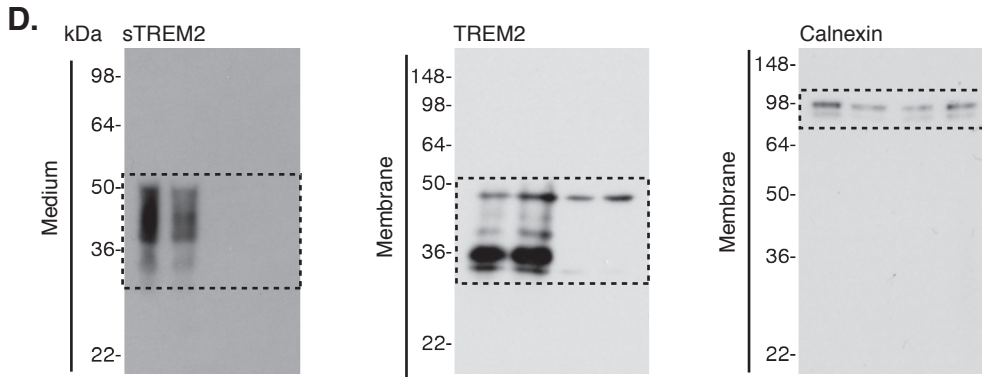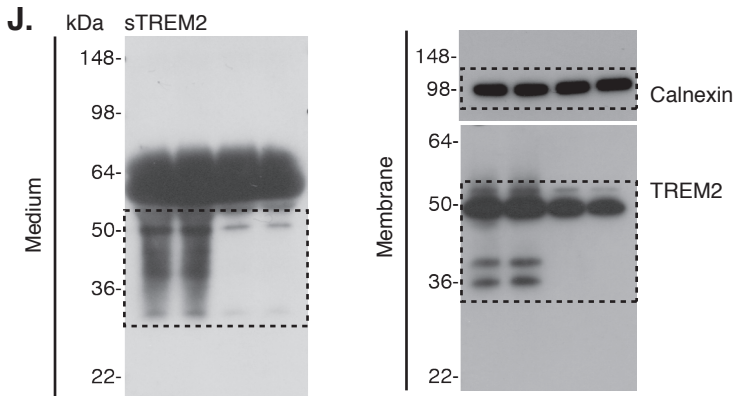

Supplement: EMMM-8-0992-s002.pdf [file EMMM-8-0992-s002.pdf]
