# Supplementary material for: TREM2 deficiency reduces the efficacy of immunotherapeutic amyloid clearance
Source: PubMed Central journal article supplement (PMC5009806; doi:10.15252/emmm.201606370), 2016-07-08
Supplement: EMMM-8-0992-s003.pdf [file EMMM-8-0992-s003.pdf]

D.

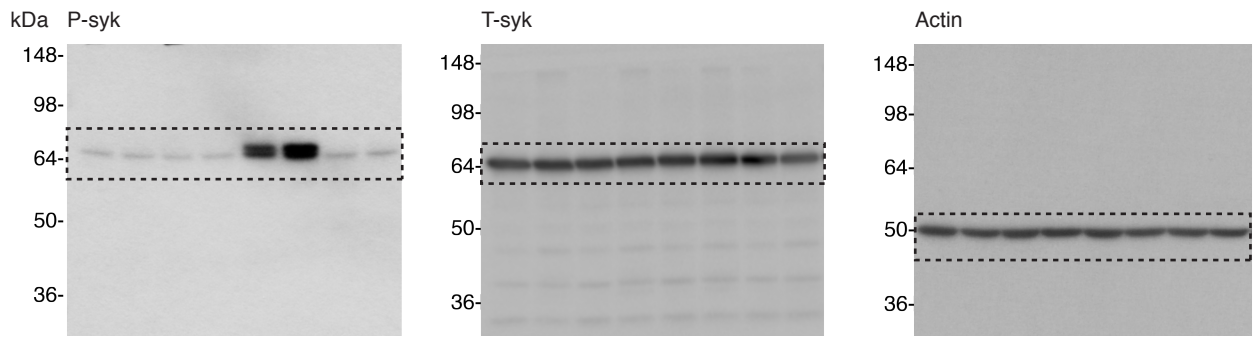

Xiang *et al.*, Fig. 2 Source data
